# Supplementary material
Source: PubMed Central journal article supplement (PMC6494689)

# Supplementary Data 1

Figure 1d

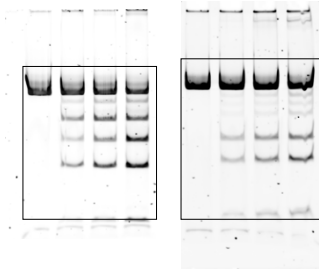

Figure 1e

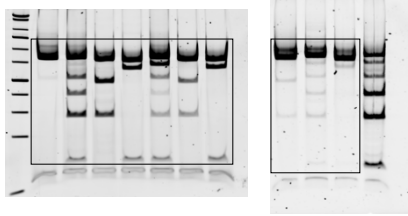

Figure 1f

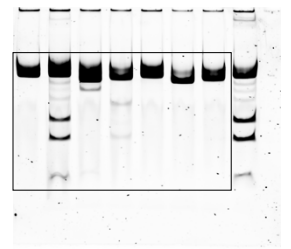

Figure 2g

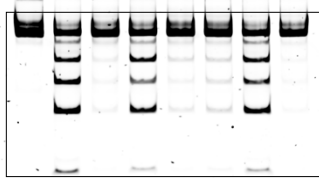

Figure 3d

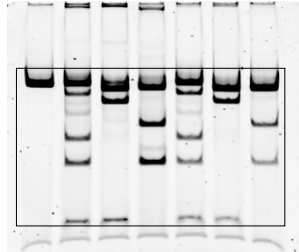

Figure 3e

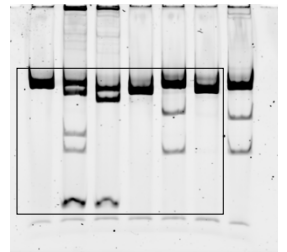

Figure 3f

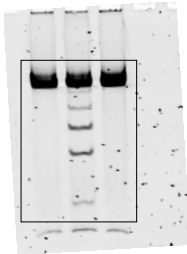

Figure 3g

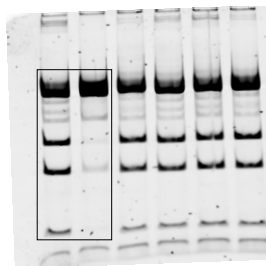

Figure 3h

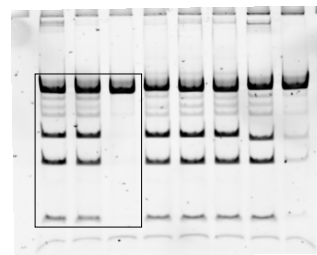

Figure 4h

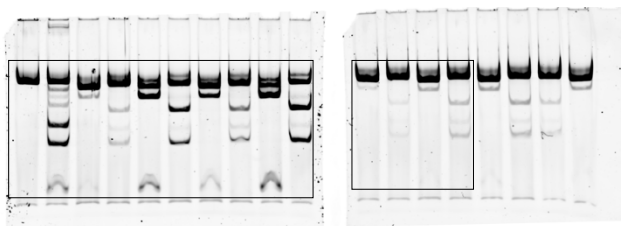

Figure 5d

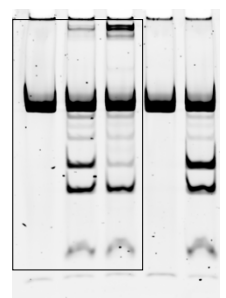

Ext Data Fig 1b

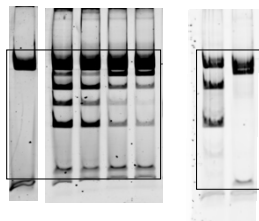

Ext Data Fig 5d

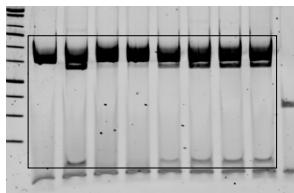

Ext Data Fig 5e

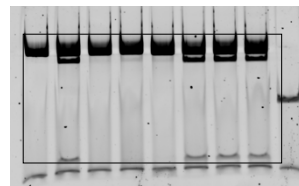

Ext Data Fig 5f

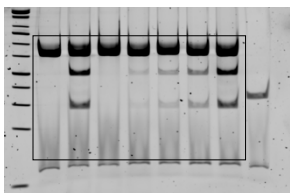

Ext Data Fig 5g

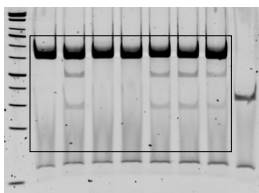

Ext Data Fig 6a

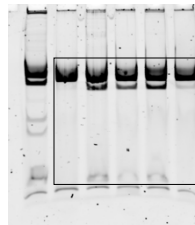

Ext Data Fig 6b

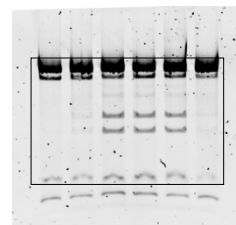

Ext Data Fig c

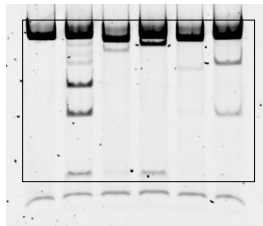

Ext Data Fig 6d

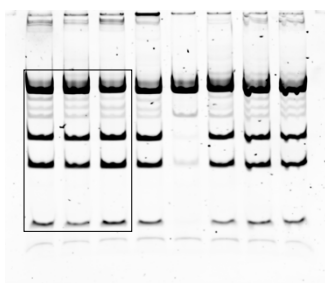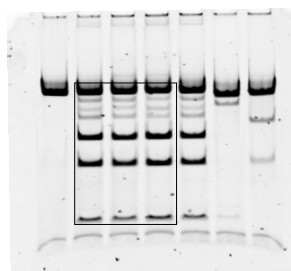

Ext Data Fig 6g

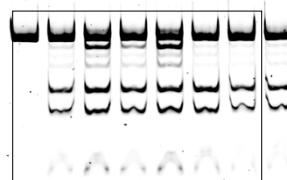

Ext Data Fig 6i

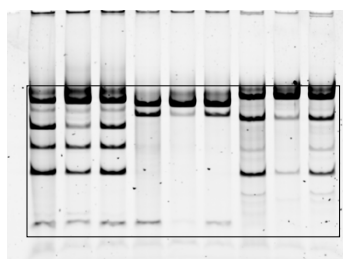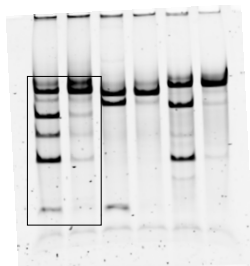

Ext Data Fig 7d

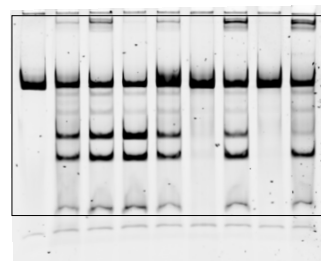

Ext Data Fig 7b

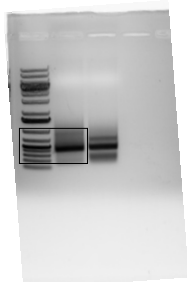

Ext Data Fig 7g

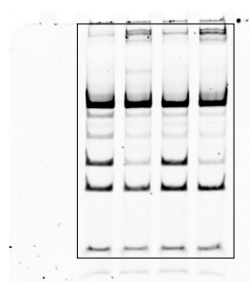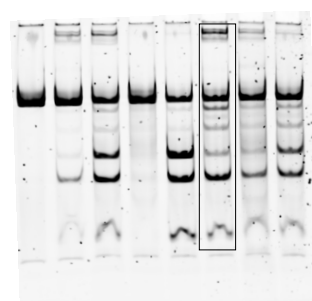

Ext Data Fig 8f

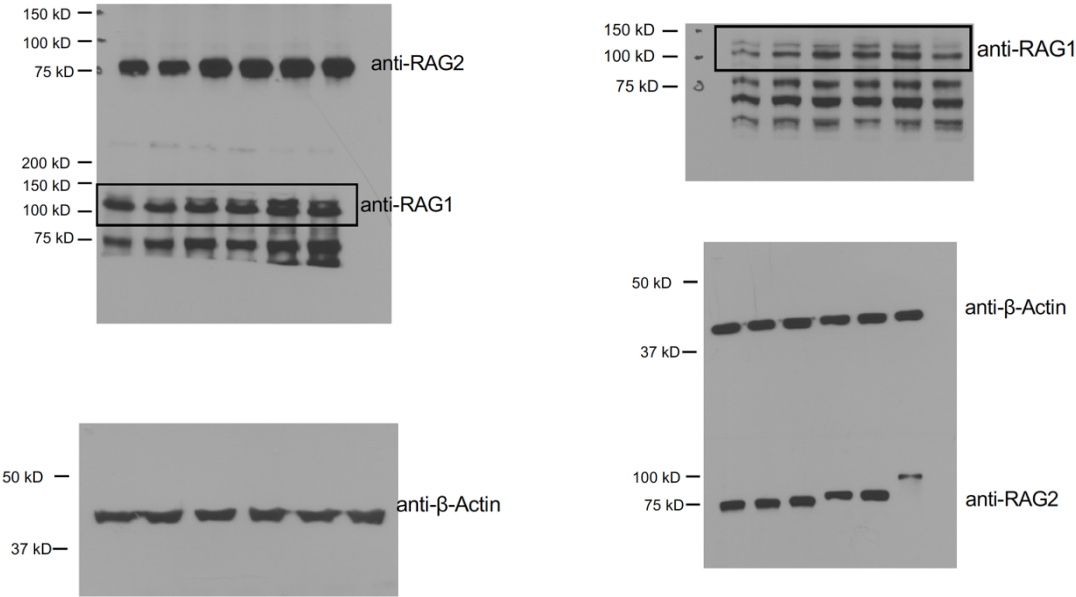

# Supplementary Data 2

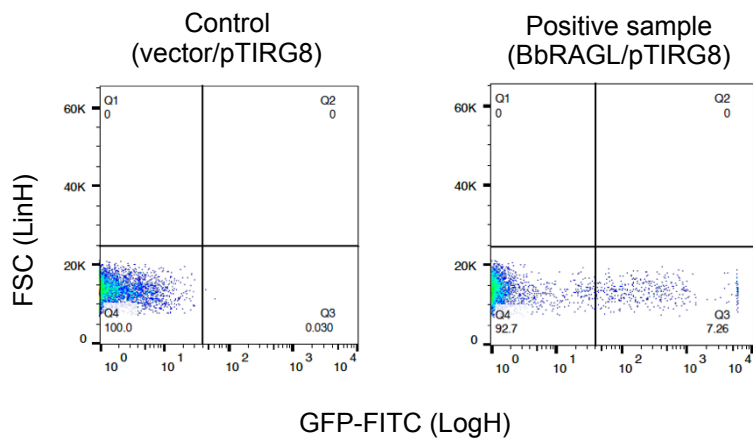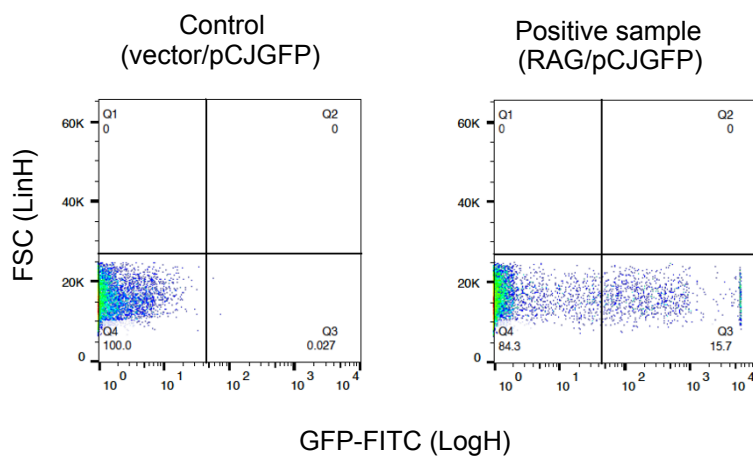

Supplement: NIHMS1523523-supplement-Supplementary_Figures.pdf [file NIHMS1523523-supplement-Supplementary_Figures.pdf]
