# Supplementary material
Source: PubMed Central journal article supplement (PMC6494689)
Supplement: NIHMS1523523-supplement-Supplementary_Information.pdf [file NIHMS1523523-supplement-Supplementary_Information.pdf]

## **SUPPLEMENTARY INFORMATION**

**Supplementary Data 1.** Uncropped gel images for data obtained by gel-based electrophoretic separation.

**Supplementary Data 2.** Examples of flow cytometry data for the *in vivo* GFP fluorescence recombination assay used to generate data for Extended Data Fig. 8c (right), e (right) and g.
